# Supplementary material for: Effect of Wnt3a on Keratinocytes Utilizing in Vitro and Bioinformatics Analysis
Source: MDPI journal article supplement (doi:10.3390/ijms15045472), 2014-03-28
Supplement: s1 [file s1]

## Supplementary Information

**Table S1.** Functional proteins associated Wnt proteins (Homo sapiens) and their protein IDs analysed in this study.

| Seq No. | Protein | Protein ID                                 | Other Information                                                                                                              |
|---------|---------|--------------------------------------------|--------------------------------------------------------------------------------------------------------------------------------|
| 1       | Wnt1    | NCBI Reference Sequence:<br>NP_005421.1    | DEFINITION: proto-oncogene Wnt-1 precursor [Homo sapiens]; ACCESSION: NP_005421;<br>VERSION: NP_005421.1 GI:4885655            |
| 2       | Wnt2    | NCBI Reference Sequence:<br>NP_003382.1    | DEFINITION: protein Wnt-2 precursor [Homo sapiens]; ACCESSION: NP_003382;<br>VERSION: NP_003382.1 GI:4507927                   |
| 3       | Wnt2B   | NCBI Reference Sequence:<br>NP_004176.2    | DEFINITION protein Wnt-2b isoform WNT-2B1 [Homo sapiens]; ACCESSION: NP_004176;<br>VERSION: NP_004176.2 GI:13518017            |
| 4       | Wnt3    | NCBI Reference Sequence:<br>NP_110380.1    | DEFINITION proto-oncogene Wnt-3 precursor [Homo sapiens]; ACCESSION: NP_110380;<br>VERSION: NP_110380.1 GI:13540477            |
| 5       | Wnt3A   | NCBI Reference Sequence:<br>NP_149122.1    | DEFINITION protein Wnt-3a precursor [Homo sapiens]; ACCESSION: NP_149122;<br>VERSION: NP_149122.1 GI:14916475                  |
| 6       | Wnt4    | NCBI Reference Sequence:<br>NP_110388.2    | DEFINITION protein Wnt-4 precursor [Homo sapiens]; ACCESSION: NP_110388;<br>VERSION: NP_110388.2 GI:174029                     |
| 7       | Wnt5A   | NCBI Reference Sequence:<br>NP_001243034.1 | DEFINITION protein Wnt-5a isoform 2 precursor [Homo sapiens]; ACCESSION: NP_001243034;<br>VERSION: NP_001243034.1 GI:371502087 |
| 8       | Wnt5B   | NCBI Reference Sequence:<br>NP_110402.2    | DEFINITION protein Wnt-5b precursor [Homo sapiens]; ACCESSION: NP_110402;<br>VERSION: NP_110402.2 GI:17402919                  |
| 9       | Wnt6    | GenBank: AAG45154.1                        | DEFINITION WNT6, partial [Homo sapiens]; ACCESSION: AAG45154; VERSION: AAG45154.1<br>GI:1200735                                |
| 10      | Wnt7A   | NCBI Reference Sequence:<br>NP_004616.2    | DEFINITION protein Wnt-7a precursor [Homo sapiens]; ACCESSION NP_004616;<br>VERSION: NP_004616.2 GI:17505191;                  |
| 11      | Wnt7B   | NCBI Reference Sequence:<br>NP_478679.1    | DEFINITION protein Wnt-7b precursor [Homo sapiens]; ACCESSION NP_478679 XP_001718810;<br>VERSION: NP_478679.1 GI:17505193;     |
| 12      | Wnt8A   | GenBank: BAB60960.1                        | DEFINITION WNT8A [Homo sapiens]; ACCESSION BAB60960; VERSION: BAB60960.1 GI:14495176                                           |
| 13      | Wnt8B   | NCBI Reference Sequence:<br>NP_003384.2    | DEFINITION protein Wnt-8b precursor [Homo sapiens]; ACCESSION NP_003384;<br>VERSION: NP_003384.2 GI:110735437                  |
| 14      | Wnt9A   | NCBI Reference Sequence:<br>NP_003386.1    | DEFINITION protein Wnt-9a precursor [Homo sapiens]; ACCESSION NP_003386;<br>VERSION: NP_003386.1 GI:15082261                   |

**Table S1.** *Cont.*

| <b>Seq No.</b> | <b>Protein</b> | <b>Protein ID</b>                       | <b>Other Information</b>                                                                                      |
|----------------|----------------|-----------------------------------------|---------------------------------------------------------------------------------------------------------------|
| 15             | Wnt9B          | GenBank: AAQ88584                       | DEFINITION WNT9B [Homo sapiens]; ACCESSION AAQ88584; VERSION: AAQ88584.1 GI:37181546                          |
| 16             | Wnt10A         | NCBI Reference Sequence:<br>NP_079492.2 | DEFINITION protein Wnt-10a precursor [Homo sapiens]; ACCESSION NP_079492;<br>VERSION: NP_079492.2 GI:16936520 |
| 17             | Wnt10B         | NCBI Reference Sequence:<br>NP_003385.2 | DEFINITION protein Wnt-10b precursor [Homo sapiens]; ACCESSION NP_003385;<br>VERSION: NP_003385.2 GI:16936522 |
| 18             | Wnt11          | NCBI Reference Sequence:<br>NP_004617.2 | DEFINITION protein Wnt-11 precursor [Homo sapiens]; ACCESSION NP_004617;<br>VERSION: NP_004617.2 GI:17017974  |
| 19             | Wnt16          | NCBI Reference Sequence:<br>NP_057171.2 | DEFINITION protein Wnt-16 isoform 2 [Homo sapiens]; ACCESSION NP_057171;<br>VERSION: NP_057171.2 GI:17402914  |

**Figure S1.** Input file for network development using string.**Your Input:**

- WNT16 wingless-type MMTV integration site family, member 16; Ligand for members of the frizzled family of seven transmembrane receptors. Probable developmental protein. May be a signaling molecule which affects the development of discrete regions of tissues. Is likely to signal over only few cell diameters (By similarity) (365 aa)
- WNT3 wingless-type MMTV integration site family, member 3; Ligand for members of the frizzled family of seven transmembrane receptors. Wnt-3 and Wnt-3a play distinct roles in cell-cell signaling during morphogenesis of the developing neural tube (By similarity) (355 aa)
- WNT6 wingless-type MMTV integration site family, member 6; Ligand for members of the frizzled family of seven transmembrane receptors. Probable developmental protein. May be a signaling molecule which affects the development of discrete regions of tissues. Is likely to signal over only few cell diameters (365 aa)
- WNT10A wingless-type MMTV integration site family, member 10A; Ligand for members of the frizzled family of seven transmembrane receptors. Probable developmental protein. May be a signaling molecule important in CNS development. Is likely to signal over only few cell diameters (417 aa)
- WNT5A wingless-type MMTV integration site family, member 5A; Ligand for members of the frizzled family of seven transmembrane receptors. Can activate or inhibit canonical Wnt signaling, depending on receptor context. In the presence of FZD4, activates beta-catenin signaling. In the presence of ROR2, inhibits the canonical Wnt pathway by promoting beta-catenin degradation through a GSK3-independent pathway which involves down-regulation of beta-catenin-induced reporter gene expression. Suppression of the canonical pathway allows chondrogenesis to occur and inhibits tumor formation. Stimulates [...] (380 aa)
- WNT2 wingless-type MMTV integration site family member 2; Ligand for members of the frizzled family of seven transmembrane receptors. Probable developmental protein. May be a signaling molecule which affects the development of discrete regions of tissues. Is likely to signal over only few cell diameters (360 aa)
- WNT9A wingless-type MMTV integration site family, member 9A; Ligand for members of the frizzled family of seven transmembrane receptors. Probable developmental protein. May be a signaling molecule which affects the development of discrete regions of tissues. Is likely to signal over only few cell diameters (By similarity) (365 aa)
- WNT3A wingless-type MMTV integration site family, member 3A; Ligand for members of the frizzled family of seven transmembrane receptors. Wnt-3 and Wnt-3a play distinct roles in cell-cell signaling during morphogenesis of the developing neural tube (352 aa)
- WNT7A wingless-type MMTV integration site family, member 7A; Ligand for members of the frizzled family of seven transmembrane receptors. Probable developmental protein. Signaling by Wnt-7a allows sexually dimorphic development of the mullerian ducts (By similarity) (349 aa)
- WNT9B wingless-type MMTV integration site family, member 9B; Ligand for members of the frizzled family of seven transmembrane receptors. Probable developmental protein. May be a signaling molecule which affects the development of discrete regions of tissues. Is likely to signal over only few cell diameters (By similarity) (357 aa)
- WNT9B wingless-type MMTV integration site family, member 9B; Ligand for members of the frizzled family of seven transmembrane receptors. Probable developmental protein. May be a signaling molecule which affects the development of discrete regions of tissues. Is likely to signal over only few cell diameters (By similarity) (357 aa)
- WNT4 wingless-type MMTV integration site family, member 4; Ligand for members of the frizzled family of seven transmembrane receptors. Probable developmental protein. May be a signaling molecule which affects the development of discrete regions of tissues. Is likely to signal over only few cell diameters (By similarity). Overexpression may be associated with abnormal proliferation in human breast tissue (351 aa)
- WNT1 wingless-type MMTV integration site family, member 1; Ligand for members of the frizzled family of seven transmembrane receptors. Probable developmental protein. May be a signaling molecule important in CNS development. Is likely to signal over only few cell diameters (370 aa)
- WNT10B wingless-type MMTV integration site family, member 10B; Ligand for members of the frizzled family of seven transmembrane receptors. Probable developmental protein. May be a signaling molecule which affects the development of discrete regions of tissues. Is likely to signal over only few cell diameters (By similarity) (389 aa)
- WNT5B wingless-type MMTV integration site family, member 5B; Ligand for members of the frizzled family of seven transmembrane receptors. Probable developmental protein. May be a signaling molecule which affects the development of discrete regions of tissues. Is likely to signal over only few cell diameters (By similarity) (359 aa)
- WNT11 wingless-type MMTV integration site family, member 11; Ligand for members of the frizzled family of seven transmembrane receptors. Probable developmental protein. May be a signaling molecule which affects the development of discrete regions of tissues. Is likely to signal over only few cell diameters (354 aa)
- WNT8B wingless-type MMTV integration site family, member 8B; Ligand for members of the frizzled family of seven transmembrane receptors. May play an important role in the development and differentiation of certain forebrain structures, notably the hippocampus (351 aa)
- WNT7B wingless-type MMTV integration site family, member 7B; Ligand for members of the frizzled family of seven transmembrane receptors. Probable developmental protein. May be a signaling molecule which affects the development of discrete regions of tissues. Is likely to signal over only few cell diameters (By similarity) (349 aa)
- WNT2B wingless-type MMTV integration site family, member 2B; Ligand for members of the frizzled family of seven transmembrane receptors. Probable developmental protein. May be a signaling molecule which affects the development of discrete regions of tissues. Is likely to signal over only few cell diameters. May be involved in normal development or differentiation as well as in carcinogenesis (391 aa)
- WNT8A wingless-type MMTV integration site family, member 8A; Ligand for members of the frizzled family of seven transmembrane receptors. May play an important role in the development and differentiation of certain forebrain structures, notably the hippocampus (351 aa) (*Homo sapiens*)
